# Supplementary material
Source: publisher figshare collection journal article supplement (https://karger.figshare.com/ndownloader/files/24108794)
Supplement: Supplementary file 1 [file 24108794]

**Supplemental** **Table 2.**Full electronic search strategy for PubMed

| 1# | "Tirofiban"[Mesh Term] |
| --- | --- |
| 2# | “N-(Butylsulfonyl)-O-(4-(4-piperidyl)butyl)-L-tyrosine”[All Fields] OR “Aggrastat”[All Fields] OR Agrastat[All Fields] OR “MK 383”[All Fields] OR “MK-383”[All Fields] OR “L 700462”[All Fields] OR “L-700462”[All Fields] OR “L-700,462”[All Fields] OR “L 700,462”[All Fields] OR “L700,462”[All Fields] OR “Tirofiban Hydrochloride”[All Fields] OR “Tirofiban Hydrochloride Monohydrate”[All Fields] |
| 3# | “Stroke” [Mesh Term] |
| 4# | “Strokes” [All Fields] OR “Cerebrovascular Accident” [All Fields] OR “Cerebrovascular Accidents” [All Fields] OR “CVA (Cerebrovascular Accident)” [All Fields] OR “CVAs (Cerebrovascular Accident)” [All Fields] OR“Cerebrovascular Apoplexy” [All Fields] OR “Apoplexy, Cerebrovascular” [All Fields] OR “Vascular Accident, Brain” [All Fields] OR “Brain Vascular Accident”[All Fields] OR “Brain Vascular Accidents”[All Fields] OR “Vascular Accidents, Brain”[All Fields] OR “Cerebrovascular Stroke”[All Fields] OR “Cerebrovascular Strokes”[All Fields] OR “Stroke, Cerebrovascular”[All Fields] OR “Strokes, Cerebrovascular “[All Fields] OR “Apoplexy”[All Fields] OR “Cerebral Stroke” [All Fields] OR “Cerebral Strokes”[All Fields] OR “Stroke, Cerebral”[All Fields] OR “Strokes, Cerebral”[All Fields] OR “Stroke, Acute”[All Fields] OR “Acute Stroke”[All Fields] OR “Acute Strokes”[All Fields] OR “Strokes, Acute”[All Fields] OR “Cerebrovascular Accident, Acute”[All Fields] OR “Acute Cerebrovascular Accident”[All Fields] OR “Acute Cerebrovascular Accidents”[All Fields] OR “Cerebrovascular Accidents, Acute” [All Fields] |
| 5# | 1 or 2 |
| 6# | 3 or 4 |
| 7# | 5 and 6 |
